# Supplementary material for: Capsid amino acids at positions 247 and 270 are involved in the virulence of betanodaviruses to European sea bass
Source: PubMed Central journal article supplement (PMC6773868; doi:10.1038/s41598-019-50622-1), 2019-10-01
Supplement: 41598_2019_50622_MOESM1_ESM.pdf [file 41598_2019_50622_MOESM1_ESM.pdf]

# Capsid amino acids at positions 247 and 270 are involved in the virulence of betanodaviruses to European sea bass

Patricia Moreno, Sandra Souto, Rocio Leiva-Rebollo, Juan J. Borrego, Isabel Bandín & M. Carmen Alonso\*

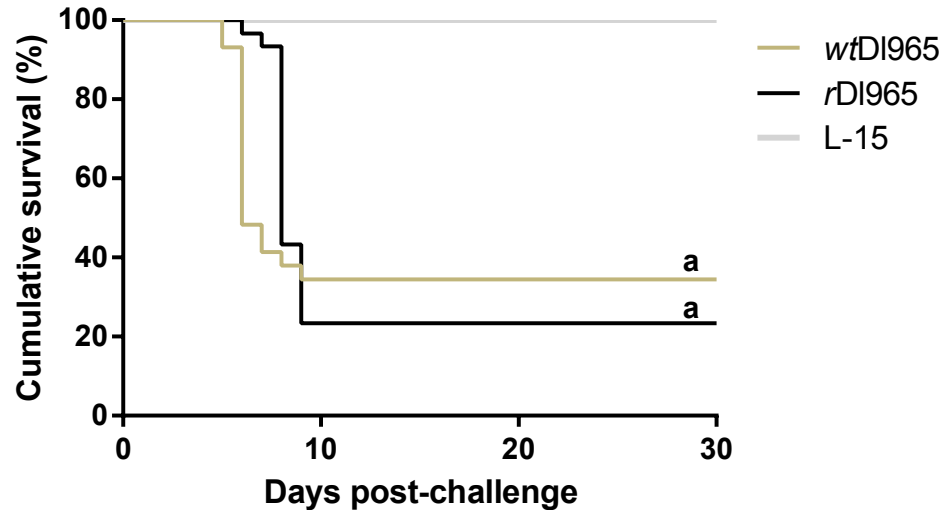

|                     | Chi square | Df | p value |
|---------------------|------------|----|---------|
| Log Rank Mantel Cox | 0.857      | 1  | 0.369   |

Figure S1. Comparative analysis between *wtDI965* and *rDI965* virulence: Kaplan-Meier survival curves. Log Rank Mantel Cox Test results are represented below the Kaplan-Meier survival curve. Same letters indicate no significant differences ( $p < 0.05$ ).

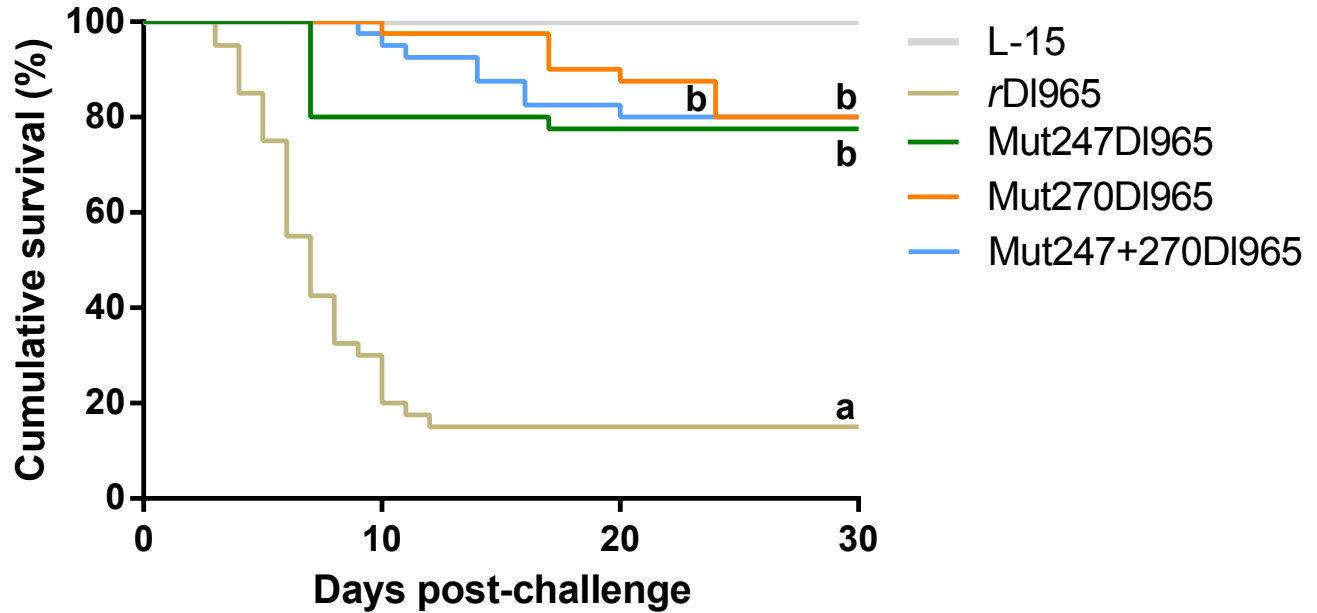

| Log Rank Mantel Cox                   | Chi square | Df | p value  |
|---------------------------------------|------------|----|----------|
| <i>rDL965 vs Mut247DI965</i>          | 36.47      | 1  | < 0.0001 |
| <i>rDL965 vs Mut270DI965</i>          | 52.86      | 1  | < 0.0001 |
| <i>rDL965 vs Mut247+270DI965</i>      | 48.55      | 1  | < 0.0001 |
| <i>Mut247 vs Mut270 vs Mut247+270</i> | 0.2822     | 2  | 0.8684   |

Figure S2. Comparative analysis between *rDI965* and mutated virus virulence: Kaplan-Meier survival curves. The log Rank Mantel Cox Test results are in a box below the Kaplan-Meier curves. Different letters indicate significant differences between experimental groups ( $p < 0.05$ ).

Table S1.- Primers used in this study. (a) Primers designed to amplify the full-length RNA1 and RNA2 segments. Several motifs are represented in colour: *Bam*HI cut site in grey, *Sac*II cut site in green, the T7 promoter sequence in blue, two guanine residues in red and *Sfo*I blunt-ended cut site in orange. (b) Set of primers used to confirm the presence of viral RNA1 and RNA2 segment during the clonation procedure. (c) Primers used for absolute quantification of RGNV RNA2 viral segment. (d) Primers used for relative quantification of immunogene transcription.

| Name               | Sequence (5'-3')                                                                                   | Product length (bp) | References                               |
|--------------------|----------------------------------------------------------------------------------------------------|---------------------|------------------------------------------|
| <b>a</b>           |                                                                                                    |                     |                                          |
| T7_5'RNA1_965      | GGATCC <sup>grey</sup> CCGCGG <sup>green</sup> TAATACGACTCACTA                                     | 3,104               | This study                               |
| 3'RNA1_965         | TAGG <sup>red</sup> TAACATCCCTTTCTTGCTCTGTT<br>GGCGCC <sup>orange</sup> GAAGCGTAGGACAGCATAAA<br>GC |                     |                                          |
| T7_5'RNA2_965      | GGATCC <sup>grey</sup> CCGCGG <sup>green</sup> TAATACGACTCACTA                                     | 1,432               | This study                               |
| 3'RNA2_965         | TAGG <sup>red</sup> TAATCCATCACCCTTTGCAATC<br>GGCGCC <sup>orange</sup> GAGTTGAAAAGCGATCAGCG<br>G   |                     |                                          |
| <b>b</b>           |                                                                                                    |                     |                                          |
| NNVs1_B3F          | AACATCCGCACTGCATACGAACTG                                                                           | 615                 | Olveira et al.,<br>(2009) <sup>5</sup>   |
| NNVs1_B3R          | ATGCTGGAGAACACTGGCTTTGAA                                                                           |                     |                                          |
| NNVs2_RG2F         | CTTCCTGCCTGATCCAACCTGACAACG                                                                        | 568                 | Olveira et al.,<br>(2009) <sup>5</sup>   |
| NNVs2_RG2R         | CCAGATGCCCCAGCGAAACCA                                                                              |                     |                                          |
| <b>c</b>           |                                                                                                    |                     |                                          |
| RG_965_RNA2 F4     | ACCGTCCGCTGTCTATTGACTA                                                                             | 126                 | Moreno et al.,<br>(2016) <sup>35</sup>   |
| RG_965_RNA2 R1     | CAGATGCCCCAGCGAAACC                                                                                |                     |                                          |
| <b>d</b>           |                                                                                                    |                     |                                          |
| rRNA18S Fw         | CCAACGAGCTGCTGACC                                                                                  | 208                 | Scapigliati et al., (2010) <sup>45</sup> |
| rRNA18S Rw         | CCGTTACCCGTGGTCC                                                                                   |                     |                                          |
| DI_MxA Fw          | ATTCTGAGTTCTTGCTGAAGG                                                                              | 113                 | Novel et al.,<br>(2013) <sup>34</sup>    |
| DI_MxA Rw          | CCTCTAGAACTCCACCAGG                                                                                |                     |                                          |
| qISG15 F2          | CGACTCAAAGCCTCTCTGCTACT                                                                            | 100                 | Moreno et al.,<br>(2016) <sup>35</sup>   |
| qISG15 R2          | CGTTTCTGACGAACACCTGGAT                                                                             |                     |                                          |
| DI_TNF $\alpha$ Fw | CGACTGGCGAACAACC                                                                                   | 220                 | Nascimento et al., (2007) <sup>46</sup>  |
| DI_TNF $\alpha$ Rw | GCTGTCCCTCCTGAGC                                                                                   |                     |                                          |
